# Supplementary material for: Effect of hydrothermal carbonization on dewatering performance of dyeing sludge
Source: Royal Society of Chemistry journal article supplement (doi:10.1039/c8ra05350b), 2018-01-01
Supplement: c8ra05350b1.pdf [file c8ra05350b1.pdf]

# Effect of Hydrothermal Carbonization on Dewatering Performance of Dyeing Sludge

Zhenjia Xu<sup>a1</sup>, Jun Zhou<sup>b1</sup>, Yongdi Liu<sup>b</sup>, Lifeng Gu<sup>c</sup>, Xujun Wu<sup>c</sup>, Xueying  
Zhang<sup>a\*</sup>

*(a. College of Environment, Nanjing Tech University, Nanjing 211816, China;*

*b. College of Biotechnology and Pharmaceutical Engineering, Nanjing Tech  
University, Nanjing 211816, China;*

*c. Zhejiang Heze Environmental Technology Co., Ltd., Changxing313100, China)*

## Supplement Information

**Table.SI 1** Experimental process parameters

| Serial number | Temperature (°C) | Reaction residence time (h) | pH  |
|---------------|------------------|-----------------------------|-----|
| 1             | 180              | 3                           | 7.0 |
| 2             | 200              | 3                           | 7.0 |
| 3             | 220              | 3                           | 7.0 |
| 4             | 240              | 3                           | 7.0 |
| 5             | 180              | 1                           | 7.0 |
| 6             | 180              | 2                           | 7.0 |
| 7             | 180              | 3                           | 7.0 |
| 8             | 180              | 4                           | 7.0 |
| 9             | 180              | 5                           | 7.0 |
| 10            | 180              | 6                           | 7.0 |
| 11            | 180              | 4                           | 5.0 |
| 12            | 180              | 4                           | 7.0 |
| 13            | 180              | 4                           | 9.0 |

**Table.SI 2** Changes in TOC and DOC before and after sludge treatment

|       |        | TOC (mg/L) |       | DOC (mg/L) |       |      |
|-------|--------|------------|-------|------------|-------|------|
|       |        | before     | after | before     | after |      |
| pH7.0 | 180°C  | 265        | 6992  | 216        | 5079  |      |
|       | 200°C  | 258        | 6260  | 207        | 4925  |      |
|       | 3h     | 220°C      | 268   | 2842       | 240   | 1942 |
|       | 240°C  | 274        | 2371  | 240        | 1914  |      |
| pH7   | 1h     | 255        | 14389 | 228        | 10559 |      |
|       | 2h     | 267        | 11816 | 240        | 8126  |      |
|       | 3h     | 263        | 6982  | 230        | 4730  |      |
|       | 180°C  | 4h         | 272   | 8986       | 234   | 6072 |
|       | 5h     | 254        | 9518  | 227        | 6802  |      |
|       | 6h     | 271        | 10352 | 231        | 6966  |      |
| 180°C | pH=5.0 | 1062       | 13822 | 960        | 10333 |      |
|       | 4h     | pH=7.0     | 266   | 8780       | 242   | 6623 |
|       | pH=9.0 | 796        | 10123 | 665        | 8099  |      |

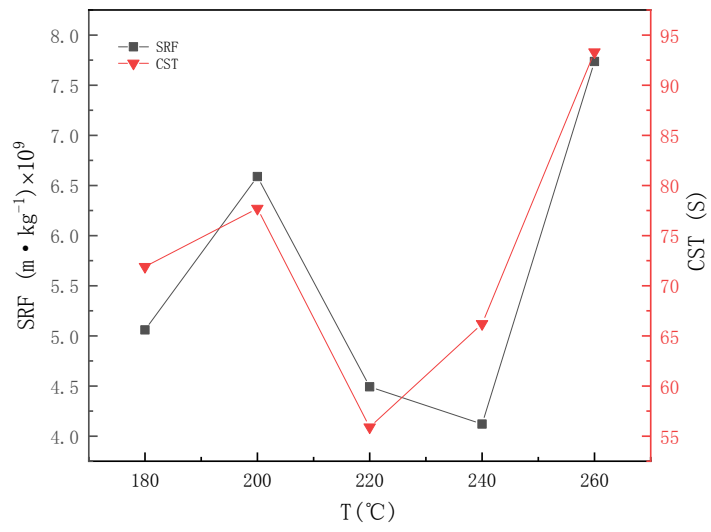

(a)

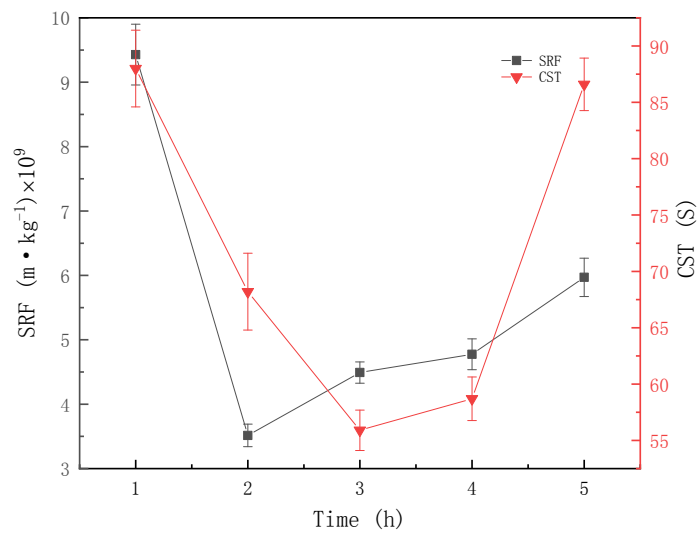

(b)

**Fig. SI 1** Changes in CST and SRF before and after sludge treatment at different temperature conditions (a); Changes in CST and SRF before and after sludge treatment at different time conditions (b)
